# Supplementary material for: An intranasal live-attenuated SARS-CoV-2 vaccine limits virus transmission
Source: PubMed Central journal article supplement (PMC10837132; doi:10.1038/s41467-024-45348-2), 2024-02-02
Supplement: 41467_2024_45348_MOESM1_ESM.pdf [file 41467_2024_45348_MOESM1_ESM.pdf]

# An Intranasal Live-Attenuated SARS-CoV-2 Vaccine Limits Virus Transmission

Julia M. Adler<sup>1</sup>, Ricardo Martin Vidal<sup>1</sup>, Christine Langner<sup>1</sup>, Daria Vladimirova<sup>1</sup>, Azza Abdelgawad<sup>1</sup>, Daniela Kunecova<sup>1</sup>, Xiaoyuan Lin<sup>1,2</sup>, Geraldine Nouailles<sup>3</sup>, Anne Voss<sup>4</sup>, Sandra Kunder<sup>4</sup>, Achim D. Gruber<sup>4</sup>, Haibo Wu<sup>2</sup>, Nikolaus Osterrieder<sup>1</sup>, Dusan Kunec<sup>1#</sup>, Jakob Trimpert<sup>1#\*</sup>

<sup>1</sup>Institut für Virologie, Freie Universität Berlin, Berlin, Germany

<sup>2</sup>School of Life Sciences, Chongqing University, Chongqing, China

<sup>3</sup>Department of Infectious Diseases, Respiratory Medicine and Critical Care, Charité – Universitätsmedizin Berlin, corporate member of Freie Universität Berlin and Humboldt-Universität zu Berlin, Berlin, Germany

<sup>4</sup>Institut für Tierpathologie, Freie Universität Berlin, Berlin, Germany

#These authors jointly supervised the study

\*Correspondence to: [trimpert.jakob@fu-berlin.de](mailto:trimpert.jakob@fu-berlin.de)

## Table of Contents

|                             |          |
|-----------------------------|----------|
| Supplementary Fig. 1. ....  | page 2-3 |
| Supplementary Fig. 2. ....  | page 4   |
| Supplementary Fig. 3. ....  | page 5   |
| Supplementary Fig. 4. ....  | page 6-7 |
| Supplementary Fig. 5. ....  | page 8-9 |
| Supplementary Fig. 6. ....  | page 10  |
| Supplementary Fig. 7. ....  | page 11  |
| Supplementary Table 1. .... | page 12  |
| Supplementary Table 2. .... | page 13  |
| Supplementary Table 3. .... | page 14  |
| Supplementary Table 4. .... | page 15  |

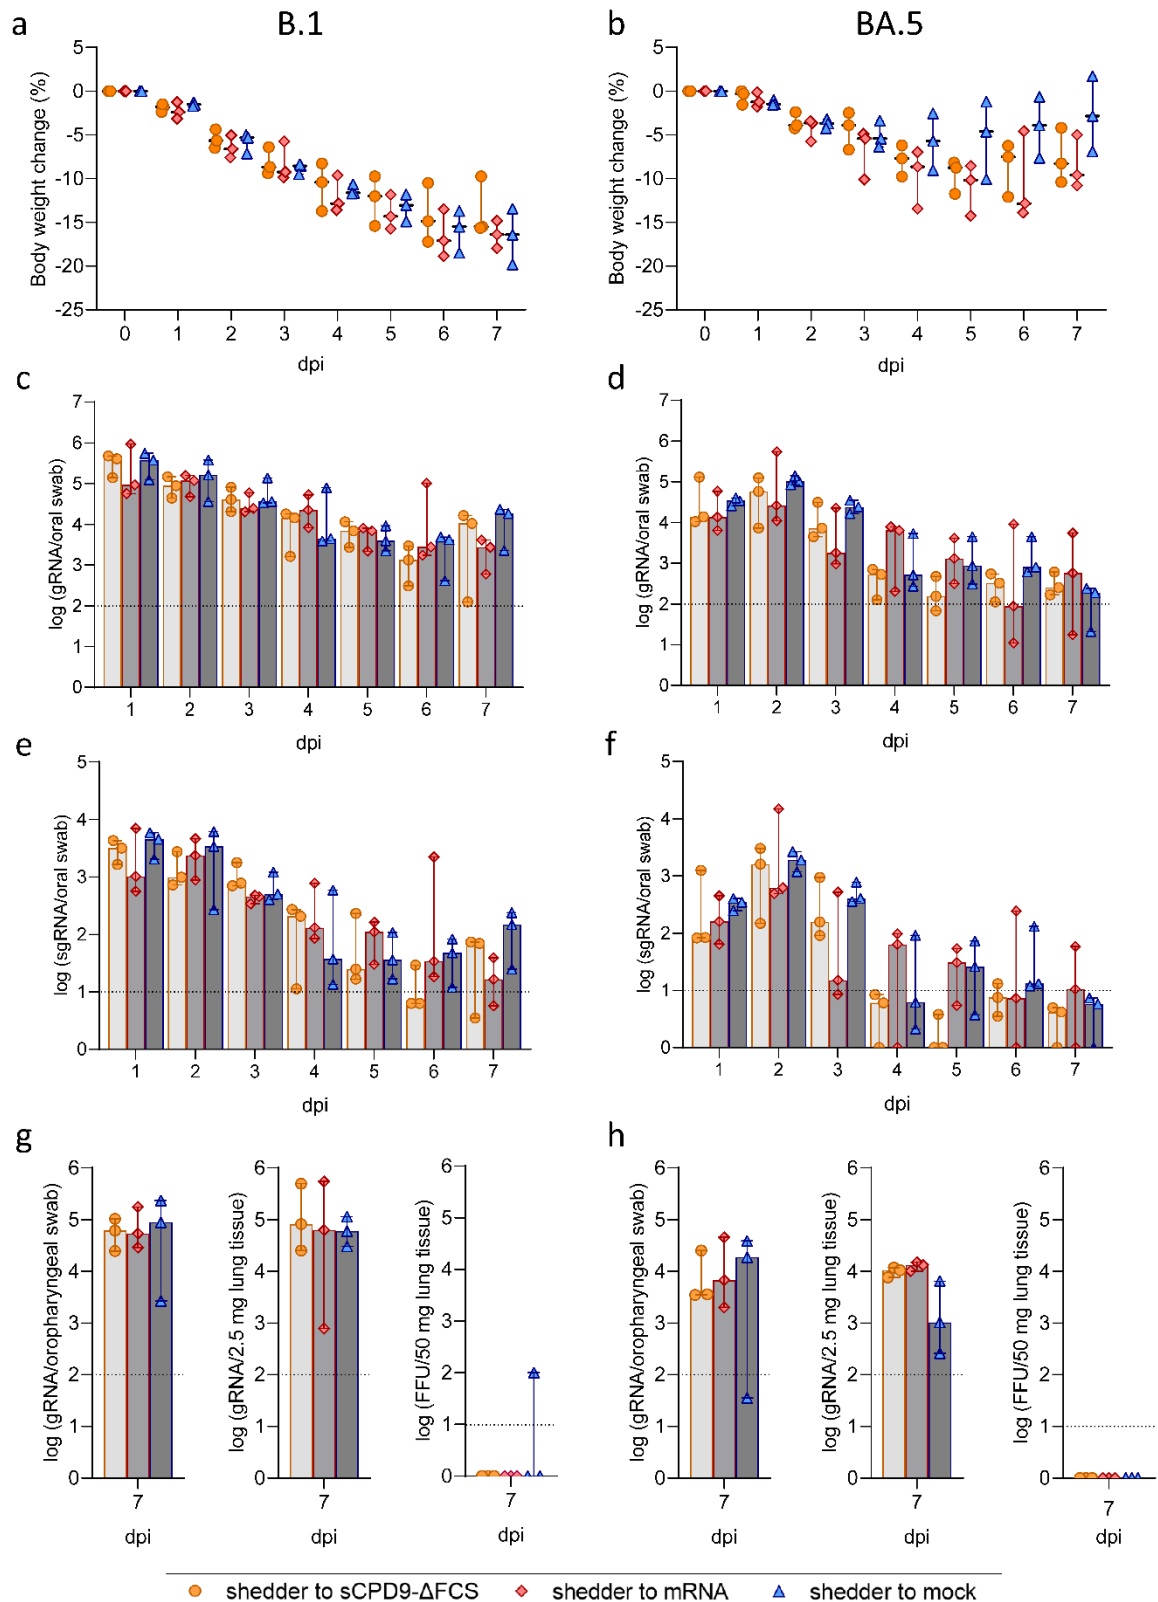

**Supplementary Fig. 1. Clinical and virological outcomes in shedder animals.** **a, b** Scatter dot plots show body weight changes in shedder hamsters ( $n=3$ ) infected with SARS-CoV-2 B.1 (**a**) or BA.5 (**b**), with symbols representing individual values and thick horizontal lines showing group medians. **c, d** Viral genomic RNA (gRNA) levels in daily oral swabs of shedder hamsters infected with B.1 (**c**) or BA.5 (**d**). **e, f** Subgenomic RNA (sgRNA) copies in oral swabs of B.1- (**e**) and BA.5-infected (**f**) shedders. **g, h** gRNA levels determined 7 days post infection (dpi) in oropharyngeal swabs and

homogenized lung tissue, as well as replication-competent virus in lungs of shedder hamsters infected with B.1 (g) or BA.5 (h). (c-h) Log transformed data of shedders (n=3) are shown with individual data points represented by symbols. The bars represent the median values, and the dotted lines indicate the limits of detection. Source data are provided as a Source Data file.

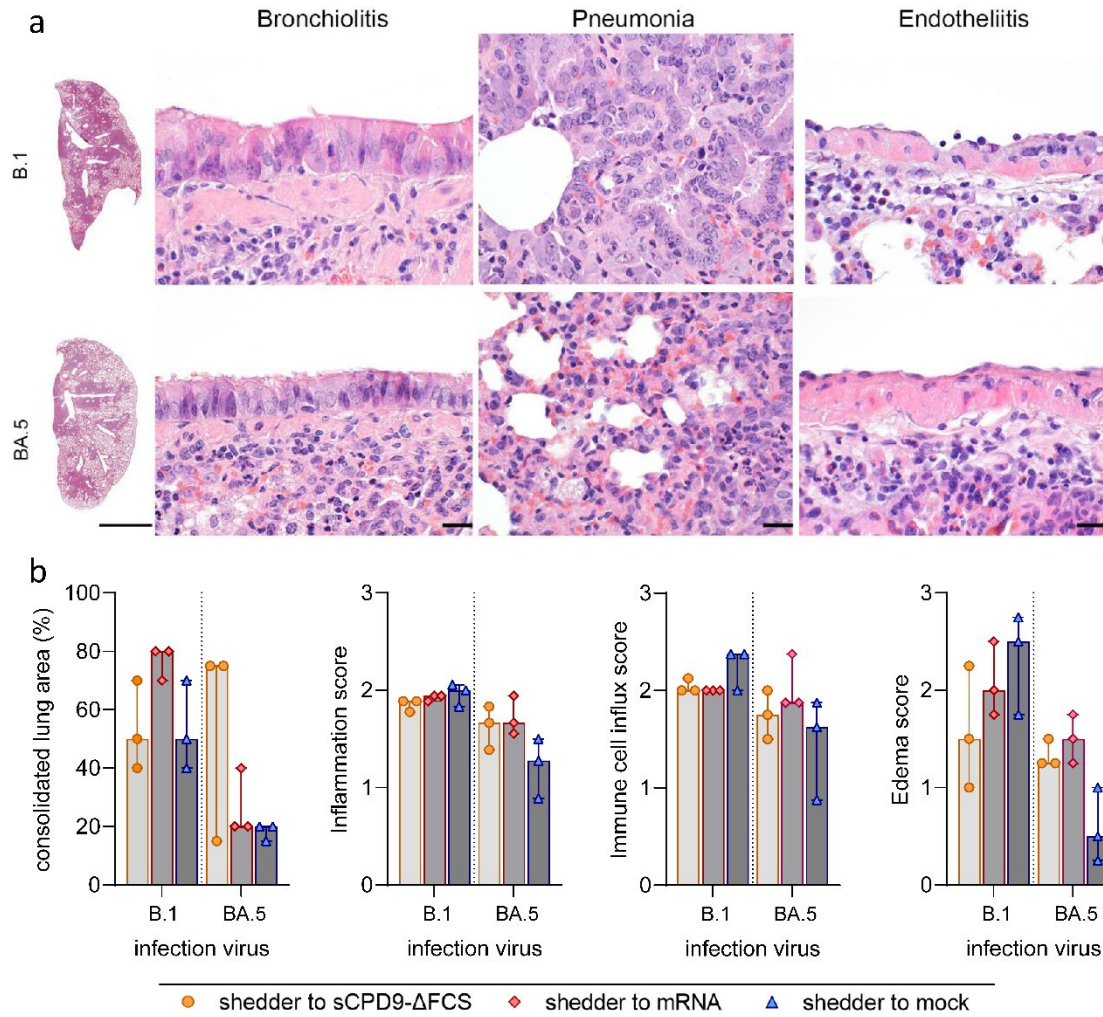

**Supplementary Fig. 2. Histopathological findings in shedder hamsters infected with SARS-CoV-2 B.1 or BA.5.** **a** Haematoxylin and eosin-stained sections of the left lung lobes obtained from shedder hamsters on day 7 after infection. Scale bars: 3 mm in the left column, and 20  $\mu$ m in all other columns. **b** Semiquantitative scoring of lung consolidation is shown in percentage and all other scores are shown on a scale of 0-3. The pulmonary inflammation score includes influx of neutrophils, lymphocytes and macrophages, bronchial epithelial necrosis, bronchitis, alveolar epithelial necrosis, perivascular lymphocyte cuffs as well as pneumocyte type II hyperplasia. Immune cell influx score accounts for infiltration of lymphocytes, neutrophils and macrophages, as well as perivascular lymphocyte cuffs. Pulmonary edema score includes perivascular and alveolar edema. Symbols represent individual values ( $n=3$ ) of shedder hamsters. Results are displayed as medians with range. Source data are provided as a Source Data file.

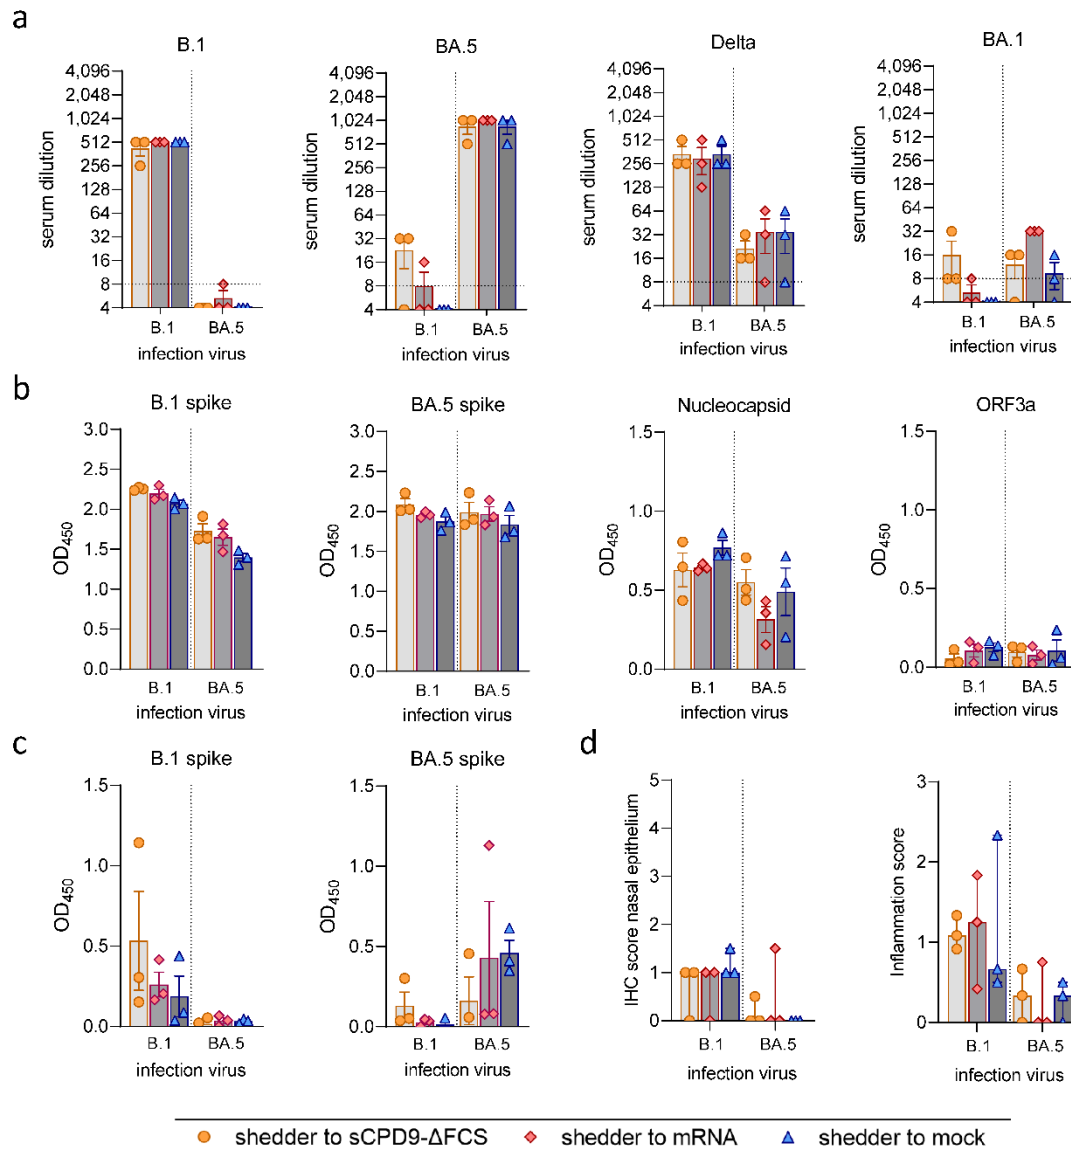

**Supplementary Fig. 3. Serological findings in shedder hamsters.** **a** Neutralizing antibody titers against SARS-CoV-2 variants B.1, BA.5, Delta and BA.1 in hamster sera collected on day 7 post infection (dpi). Individual values (n=3) are shown as symbols. The bars depict the mean, and the error bars indicate the SEM. Lower limit of detection is indicated by the dotted line (UDL=1:1,024). **b** SARS-CoV-2-specific IgG antibody levels in serum of shedder animals collected 7 dpi. Individual values of shedders (n=3) are represented by the symbols, mean  $\pm$  SEM are shown for optical density (OD) measurements at 450 nm. **c** IgA antibody levels against the spike protein of SARS-CoV-2 B.1 and BA.5 in nasal washes of shedder hamsters obtained 7 dpi. Individual values (n=3), mean  $\pm$  SEM are shown for OD measurements at 450 nm. **d** Quantification of SARS-CoV-2 nucleocapsid protein (N) and pathological changes in nasal epithelium of vaccinated contacts. The presence of N in nasal epithelium was detected through immunohistochemical (IHC) staining. The quantity of N and pathological changes in the epithelium were assessed using a semi-quantitative approach. Scoring of inflammatory changes considered the presence of lymphocytes and neutrophils, olfactory and respiratory epithelial necrosis, apoptosis, loss of cilia and flattened epithelial cells. Shown are the individual scores of shedders (n=3), and the median with range. Source data are provided as a Source Data file.

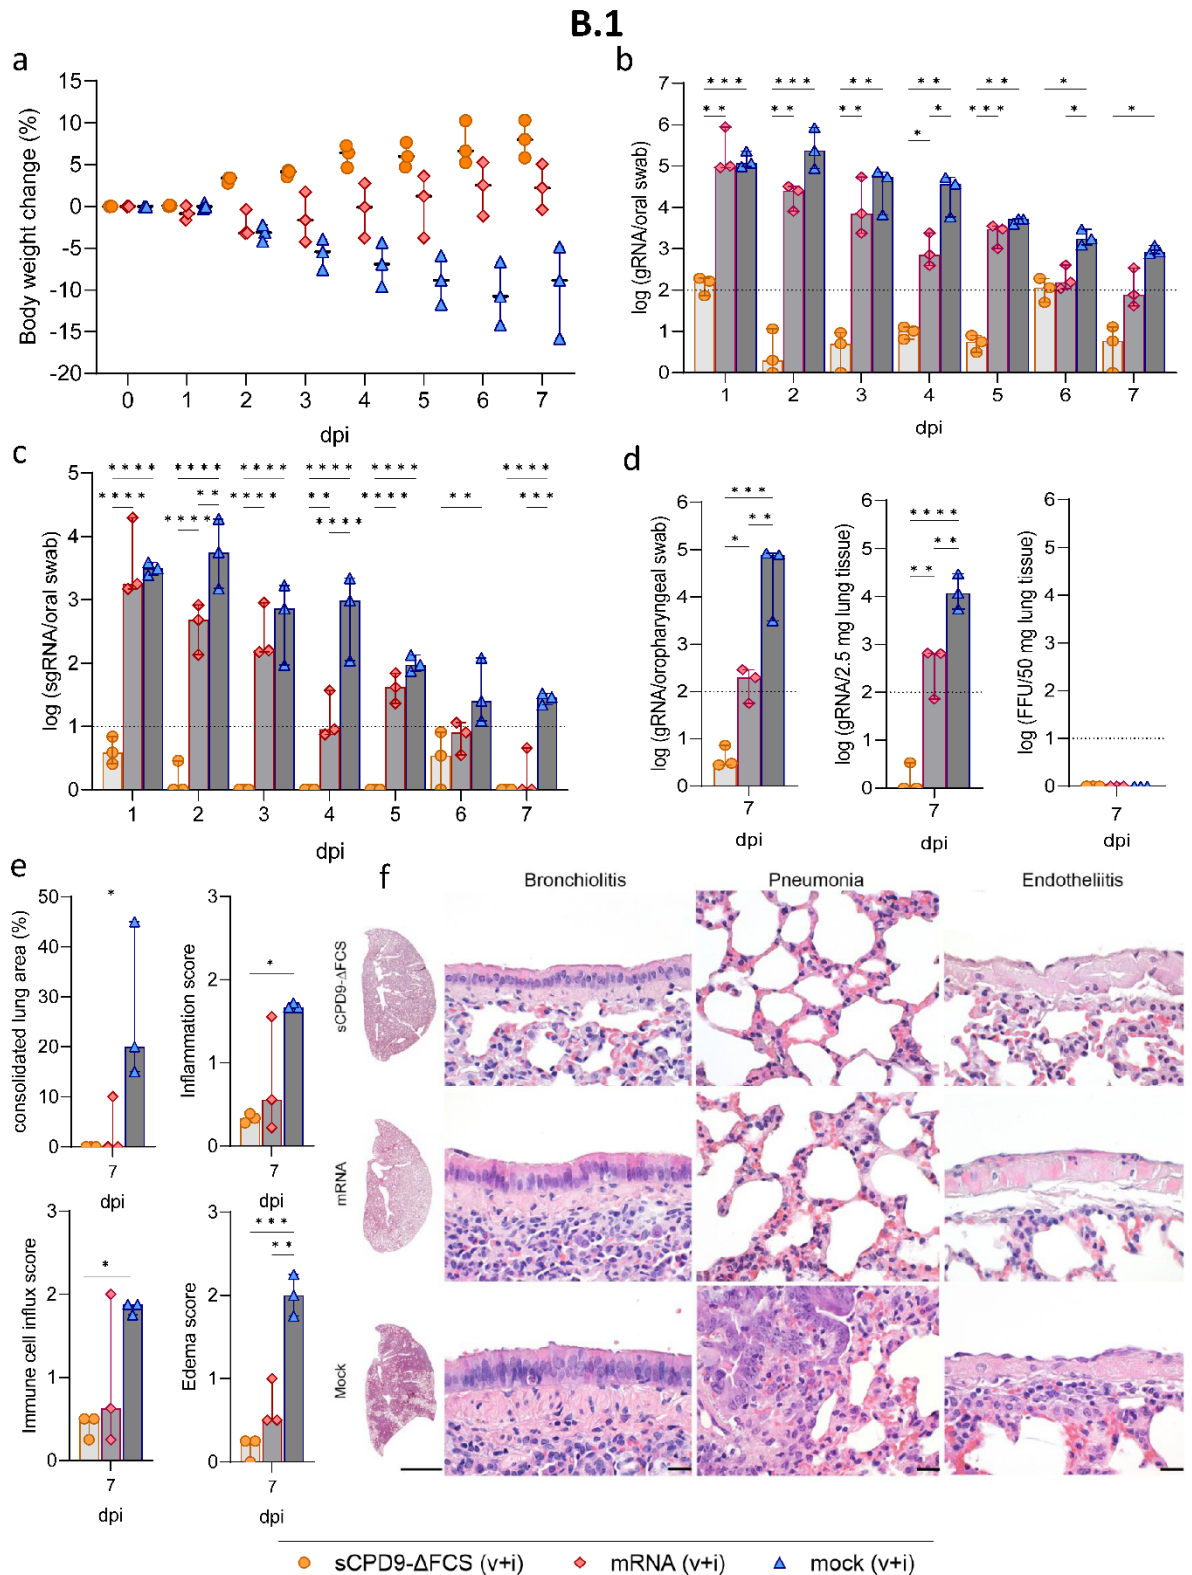

**Supplementary Fig. 4. Clinical, virological and histopathological findings in vaccinated and B.1-infected animals (v+i).** **a** Body weight change of vaccinated and B.1-infected animals (n=3). Symbols indicate individual values and thick horizontal lines showing group medians. **b, c** Viral gRNA (b) and sgRNA (c) levels in oral swabs. **d** Viral gRNA levels in oropharyngeal swabs and homogenized lung tissue, and the number of infectious virus particles present in hamster lungs at termination. **e** Histopathological scoring of inflammatory changes. The extent of consolidated lung area is shown in percentage. All other scores are shown on a scale of 0-3. Pneumonia score includes the influx of

neutrophils, lymphocytes and macrophages, bronchial epithelial necrosis, bronchitis, alveolar epithelial necrosis, perivascular lymphocyte cuffs as well as pneumocyte type II hyperplasia. Immune cell influx score accounts for the infiltration of lymphocytes, neutrophils and macrophages, as well as perivascular lymphocyte cuffs. Pulmonary edema score includes perivascular and alveolar edema. Throughout b-e, symbols represent individual values of vaccinated and B.1-infected shedders (n=3), the detection limits are indicated by dotted lines, median values are represented by bars, and the range is displayed using error bars. **b-d** Log transformed data. **b, c** Ordinary two-way ANOVA with Tukey's multiple comparisons test was performed. **d, e** Ordinary one-way ANOVA with Tukey's multiple comparisons test was conducted. \*  $p < 0.05$ , \*\*  $p < 0.01$ , \*\*\*  $p < 0.001$ , and \*\*\*\*  $p < 0.0001$ . **f** Haematoxylin and eosin-stained sections of the left lung lobes of vaccinated hamsters infected with SARS-CoV-2 B.1. Scale bars: 3 mm in the left and 20  $\mu\text{m}$  in all other columns. Source data are provided as a Source Data file.



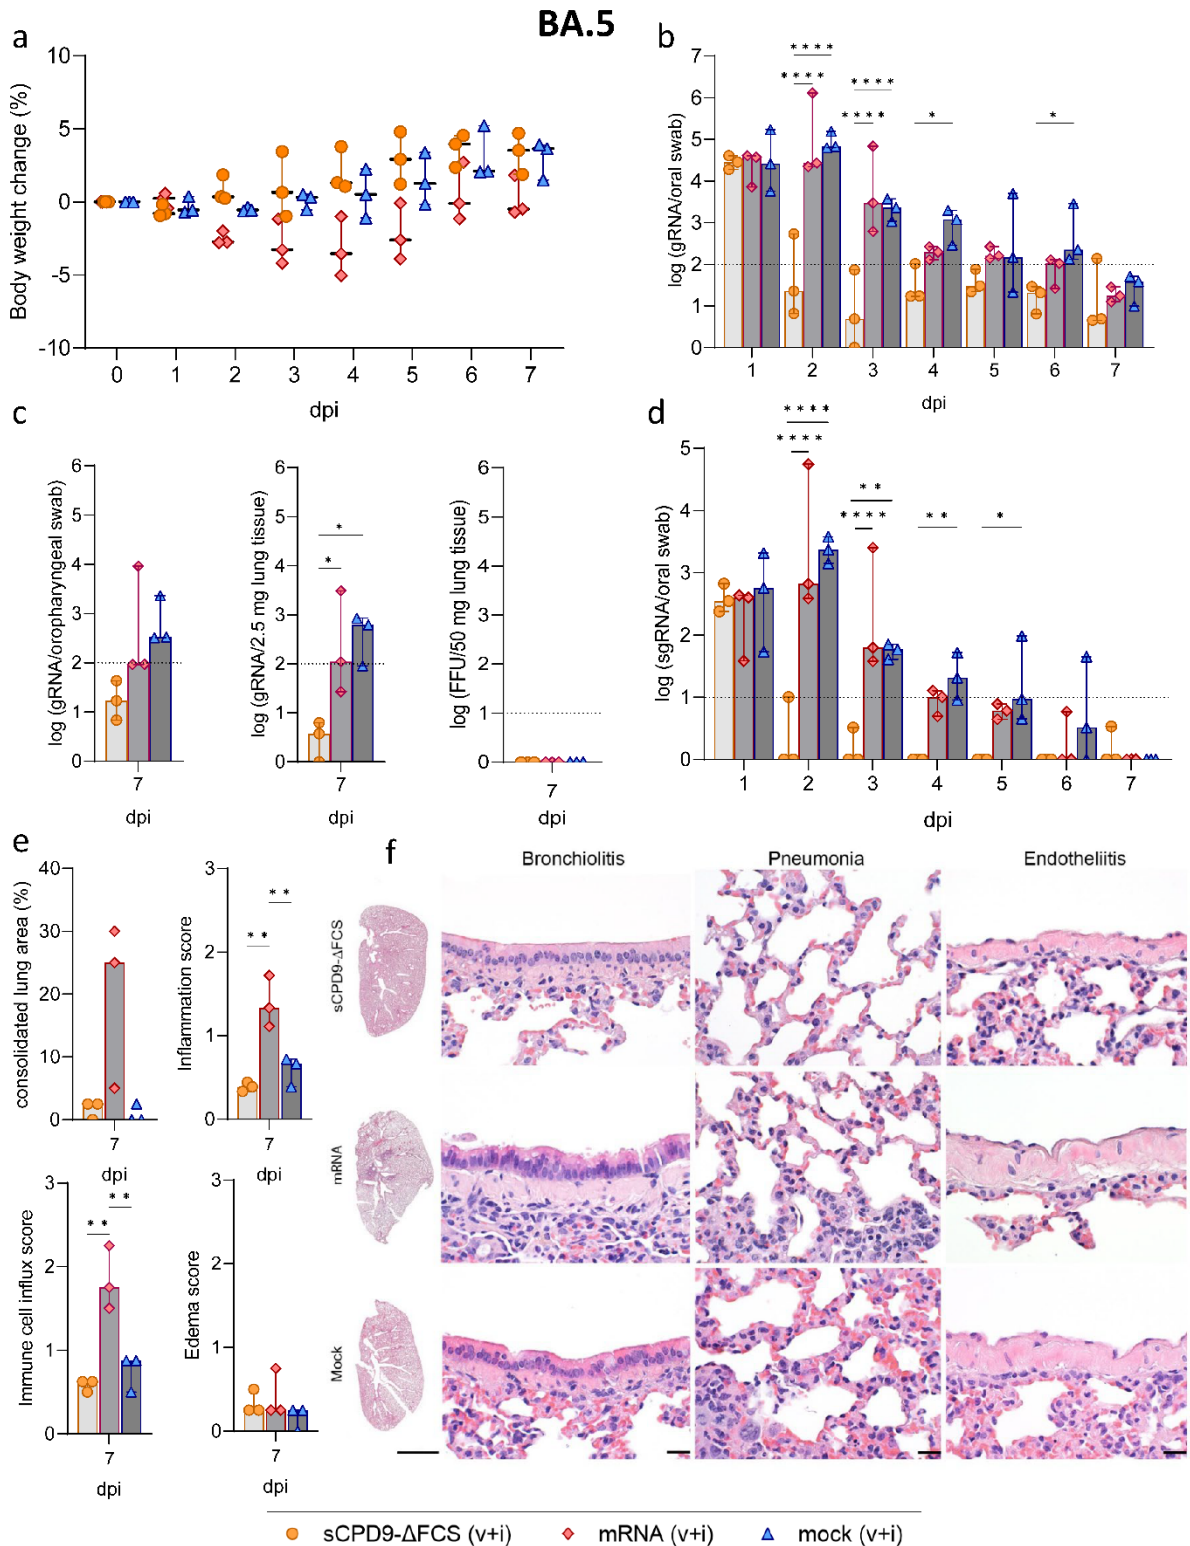

**Supplementary Fig. 5. Clinical, virological and histopathological findings of vaccinated and BA.5 infected animals.** **a** Body weight change of vaccinated and BA.5-infected animals (n=3). Symbols indicate individual values and thick horizontal lines showing group medians. **b** Viral gRNA levels in daily collected oral swabs. **c** Viral gRNA levels in oropharyngeal swabs and homogenized lung tissue, as well as the number of infectious virus particles present in hamster lungs obtained at termination, 7 days after infection (dpi). **d** sgRNA copies in oral swabs. **e** Histopathological scoring of lung sections. Lung consolidation is shown in percentage, and all other scores are shown on a scale

of 0-3, Pneumonia score includes the influx of neutrophils, lymphocytes and macrophages, bronchial epithelial necrosis, bronchitis, alveolar epithelial necrosis, perivascular lymphocyte cuffs as well as pneumocyte type II hyperplasia. Immune cell influx score accounts for infiltration of lymphocytes, neutrophils and macrophages, as well as perivascular lymphocyte cuffs. Pulmonary edema score includes perivascular and alveolar edema. Throughout b-d, log transformed data are shown, symbols represent individual values of vaccinated and BA.5-infected shedders (n=3), the detection limits are indicated by dotted lines, median values are represented by bars, and the range is displayed using error bars. **b, d** Ordinary two-way ANOVA with Tukey's multiple comparisons test was performed. **c, e** Ordinary one-way ANOVA with Tukey's multiple comparisons test was conducted. \*  $p < 0.05$ , \*\*  $p < 0.01$ , \*\*\*  $p < 0.001$ , and \*\*\*\*  $p < 0.0001$ . **f** Haematoxylin and eosin-stained sections of the left lung lobes of vaccinated hamsters infected with Omicron BA.5. Scale bars: 3 mm in the left column and 20  $\mu\text{m}$  in all other columns. Source data are provided as a Source Data file.

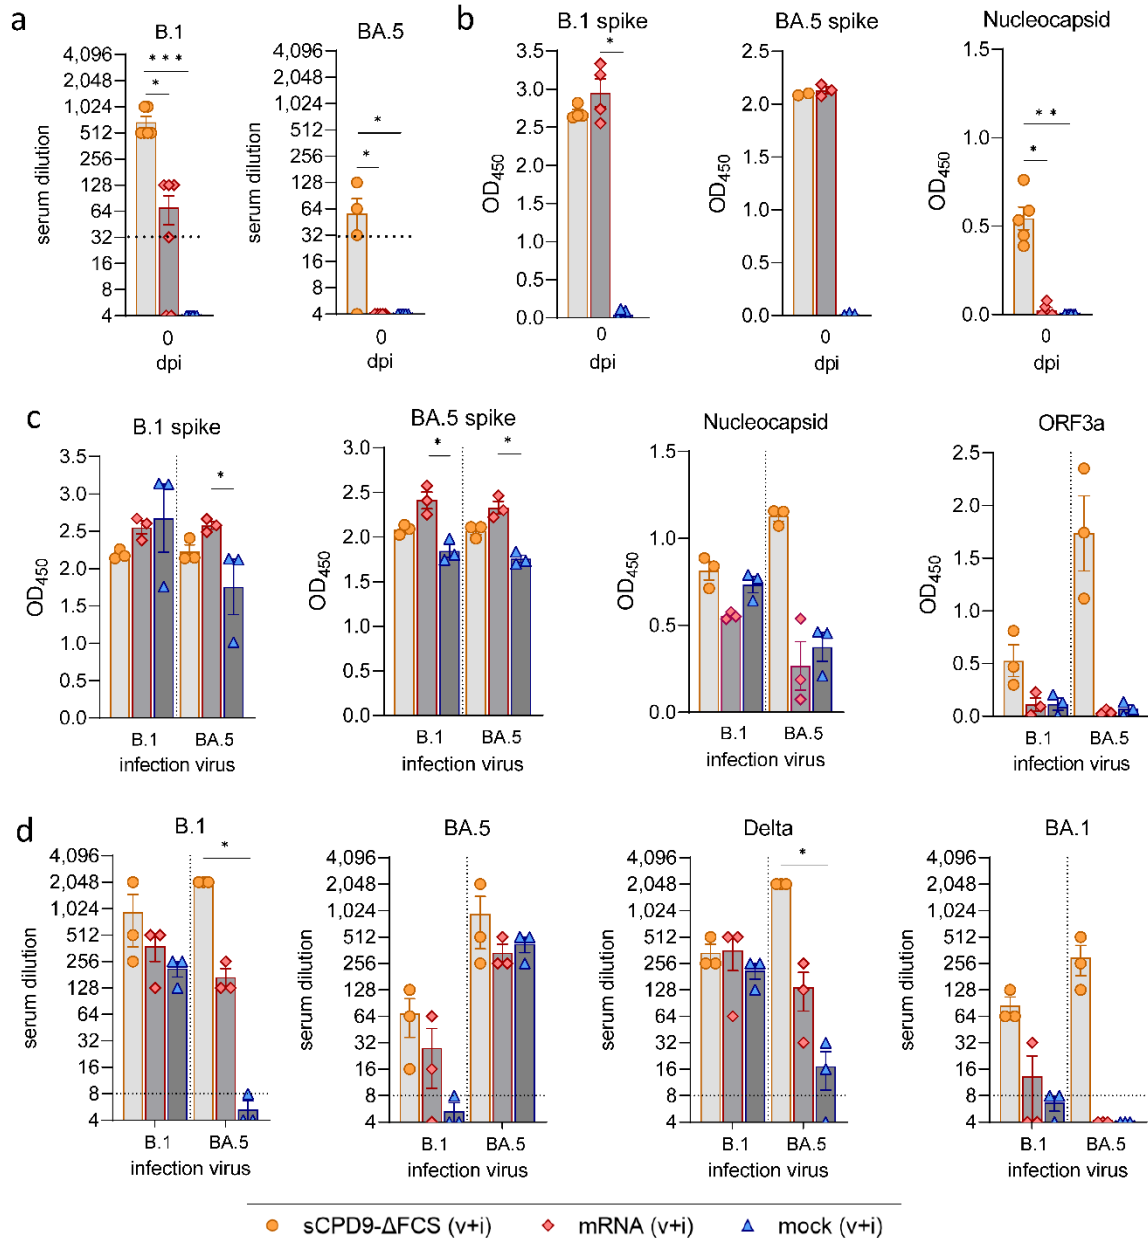

**Supplementary Fig. 6. Humoral immune response in vaccinated and challenge-infected animals.** **a** Neutralizing capacity against SARS-CoV-2 B.1 (n=6) and Omicron BA.5 (sCPD9-ΔFCS n=4, mRNA and mock n=5) in sera collected prior to infection (0 dpi). The lower limit of detection (1:32) is shown as dotted line and the upper limit is set at 1:4,096. **b, c** SARS-CoV-2-specific IgG antibody levels in sera of vaccinated and infected hamsters. The IgG levels against different SARS-CoV-2 proteins were quantified by ELISA. IgG levels against the spike protein of SARS-CoV-2 B.1 and BA.5 and the nucleocapsid protein (irrespective of the virus variant) were quantified in sera collected both before the infection (B.1 spike: sCPD9-ΔFCS n=4, mRNA n=4, mock n=5; BA.5 spike: sCPD9-ΔFCS n=2, mRNA n=3, mock n=3; Nucleocapsid: sCPD9-ΔFCS n=5, mRNA n=5, mock n=6) (b) and on day 7 after infection (n=3) (c). IgG antibody levels against the ORF3a protein were measured only in sera collected at 7 dpi, due to limited serum quantities of samples collected at 0 dpi. Values show optical density (OD) measurements obtained at 450 nm. **d** Serum neutralization titers against SARS-CoV-2 variants B.1, BA.5, Delta and BA.1 in sera collected 7 dpi (n=3). The lower limit of detection is 1:8, and the upper limit of detection is 1:1,024. In all panels (a-d) the data for vaccinated and infected animals is displayed as mean ± SEM, with individual values represented by symbols. Kruskal-Wallis test with Dunn's multiple comparisons test. \* p < 0.05, \*\* p < 0.01, and \*\*\* p < 0.001. Source data are provided as a Source Data file.

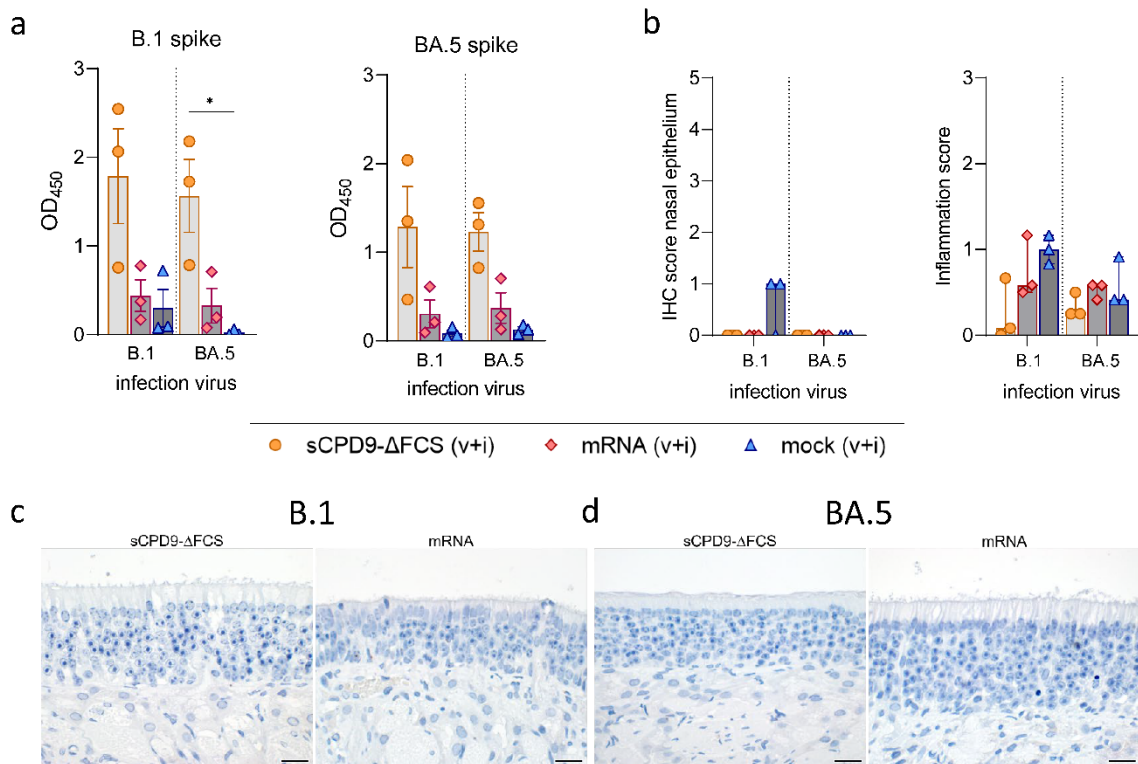

**Supplementary Fig. 7. Mucosal immunity in vaccinated and challenge-infected animals. a** IgA antibody levels against the spike protein of SARS-CoV-2 B.1 and BA.5 detected in nasal washes of shedder hamsters (n=3) collected 7 days after infection. The IgA levels were quantified by ELISA. The OD was measured at 450 nm. The data are displayed as mean ± SEM, with individual values represented by symbols. Kruskal-Wallis test with Dunn's multiple comparisons test. \* p < 0.05. **b** Semi-quantitative evaluation of the presence of SARS-CoV-2 N protein in nasal epithelium of vaccinated and challenged shedders (n=3). The nucleocapsid (N) protein in nasal epithelium was detected through immunohistochemical (IHC) staining. The quantity of N protein and pathological changes in the epithelium were assessed in a semi-quantitative manner. Scoring of inflammatory changes accounts for the presence of lymphocytes, neutrophils, olfactory and respiratory epithelial necrosis, apoptosis, loss of cilia and flattened epithelial cells. Shown are the individual scores, and the median with range. **c, d** Immunohistochemical staining of SARS-CoV-2 N protein with DAB chromogen (expected brown precipitate) and hemalum counterstain (blue). Refer to Fig. 6 for the positive control. Scale bars: 20 μm. Source data are provided as a Source Data file.

|                           |  | Transmission to vaccinated contacts |                    |          |                    |                    |          |                    |                    |          |                    |                    |          |                    |                    |          |                    |                    |          |
|---------------------------|--|-------------------------------------|--------------------|----------|--------------------|--------------------|----------|--------------------|--------------------|----------|--------------------|--------------------|----------|--------------------|--------------------|----------|--------------------|--------------------|----------|
|                           |  | sCPD9 AFCS                          |                    |          |                    |                    |          |                    |                    |          |                    |                    |          |                    |                    |          |                    |                    |          |
| Infection virus (shedder) |  | SARS-CoV-2 B.1                      |                    |          |                    |                    |          |                    |                    |          | Omicron BA.5       |                    |          |                    |                    |          |                    |                    |          |
| Cage                      |  | 1                                   |                    |          | 2                  |                    |          | 3                  |                    |          | 4                  |                    |          | 5                  |                    |          | 6                  |                    |          |
| gRNA copies per           |  | vaccinated contact                  | vaccinated contact | shedder  | vaccinated contact | vaccinated contact | shedder  | vaccinated contact | vaccinated contact | shedder  | vaccinated contact | vaccinated contact | shedder  | vaccinated contact | vaccinated contact | shedder  | vaccinated contact | vaccinated contact | shedder  |
| Oral swab 0 dpc           |  | 5.96E+01                            | 1.00E+00           | 4.07E+05 | 1.00E+00           | 1.00E+00           | 4.76E+05 | 1.00E+00           | 1.00E+00           | 1.40E+05 | 1.00E+00           | 1.00E+00           | 1.30E+05 | 1.00E+00           | 8.30E+00           | 1.38E+04 | 2.53E+00           | 3.90E+00           | 1.06E+04 |
| Oral swab 1 dpc           |  | 9.92E+02                            | 3.98E+01           | 4.41E+04 | 1.33E+02           | 2.81E+02           | 1.46E+05 | 8.77E+02           | 2.71E+02           | 8.82E+04 | 3.68E+01           | 2.28E+02           | 1.24E+05 | 2.63E+02           | 1.19E+03           | 5.83E+04 | 2.85E+00           | 1.09E+02           | 7.35E+03 |
| Oral swab 2 dpc           |  | 1.24E+02                            | 4.98E+01           | 4.07E+04 | 8.75E+01           | 6.03E+01           | 8.08E+04 | 3.87E+01           | 3.95E+01           | 2.07E+04 | 1.36E+02           | 1.37E+01           | 4.48E+03 | 9.07E+00           | 3.53E+00           | 7.22E+03 | 1.39E+02           | 1.00E+00           | 3.16E+04 |
| Oral swab 3 dpc           |  | 1.29E+01                            | 3.09E+01           | 1.81E+04 | 3.18E+01           | 1.37E+01           | 1.45E+04 | 3.72E+01           | 4.59E+01           | 1.63E+03 | 6.39E+00           | 1.10E+01           | 7.08E+02 | 1.69E+01           | 1.06E+01           | 1.27E+02 | 1.00E+00           | 1.00E+00           | 5.29E+02 |
| Oral swab 4 dpc           |  | 3.86E+01                            | 3.73E+01           | 2.74E+03 | 2.15E+01           | 5.25E+01           | 1.16E+04 | 9.67E+01           | 6.54E+01           | 6.93E+03 | 4.78E+02           | 4.43E+02           | 6.81E+01 | 9.45E+00           | 3.71E+00           | 4.74E+02 | 1.13E+02           | 8.05E+01           | 1.56E+02 |
| Oral swab 5 dpc           |  | 6.22E+01                            | 4.39E+01           | 1.33E+03 | 5.30E+01           | 5.08E+01           | 2.94E+03 | 3.37E+01           | 2.91E+01           | 3.06E+02 | 3.95E+01           | 2.54E+01           | 1.13E+02 | 5.02E+00           | 1.00E+00           | 3.26E+02 | 4.89E+00           | 1.00E+00           | 5.50E+02 |
| Oral swab 6 dpc           |  | 4.38E+00                            | 2.90E+00           | 1.25E+02 | 1.22E+02           | 1.69E+01           | 1.65E+04 | 5.05E+00           | 3.53E+02           | 1.05E+04 | 1.03E+02           | 1.00E+00           | 6.11E+02 | 1.60E+02           | 1.00E+00           | 2.54E+02 | 1.84E+02           | 9.87E+01           | 1.68E+02 |
| Oropharyngeal swab        |  | 2.02E+02                            | 1.26E+01           | 2.47E+04 | 1.51E+02           | 4.35E+01           | 6.14E+04 | 3.56E+01           | 2.42E+01           | 1.04E+05 | 9.66E+00           | 5.67E+00           | 2.51E+04 | 6.42E+00           | 3.11E+01           | 3.59E+03 | 3.28E+02           | 1.83E+02           | 3.47E+03 |
| 2.5mg lung tissue         |  | 3.54E+00                            | 1.00E+00           | 8.24E+04 | 1.00E+00           | 2.35E+00           | 4.97E+05 | 1.00E+00           | 4.51E+00           | 2.51E+04 | 1.00E+00           | 5.13E+00           | 7.58E+03 | 2.46E+01           | 2.16E+00           | 1.18E+04 | 4.76E+00           | 1.00E+00           | 1.05E+04 |
| FFU per 50 mg lung tissue |  | 1.00E+00                            | 1.00E+00           | 1.00E+00 | 1.00E+00           | 1.00E+00           | 1.00E+00 | 1.00E+00           | 1.00E+00           | 1.00E+00 | 1.00E+00           | 1.00E+00           | 1.00E+00 | 1.00E+00           | 1.00E+00           | 1.00E+00 | 1.00E+00           | 1.00E+00           | 1.00E+00 |
| SNT B.1                   |  | 1024                                | 512                | 512      | 512                | 2048               | 256      | 256                | 1024               | 512      | 512                | 2048               | 4        | 256                | 512                | 4        | 256                | 256                | 4        |
| SNT Delta                 |  | 512                                 | 256                | 512      | 256                | 512                | 256      | 256                | 512                | 256      | 512                | 1024               | 16       | 256                | 512                | 16       | 256                | 256                | 32       |
| SNT BA.1                  |  | 64                                  | 8                  | 32       | 32                 | 64                 | 8        | 32                 | 64                 | 8        | 8                  | 64                 | 4        | 8                  | 32                 | 16       | 32                 | 32                 | 16       |
| SNT BA.5                  |  | 128                                 | 8                  | 32       | 32                 | 128                | 32       | 4                  | 128                | 4        | 32                 | 256                | 512      | 16                 | 128                | 1024     | 8                  | 64                 | 1024     |
| Vaccination (contacts)    |  | mRNA                                |                    |          |                    |                    |          |                    |                    |          |                    |                    |          |                    |                    |          |                    |                    |          |
| Infection virus (shedder) |  | SARS-CoV-2 B.1                      |                    |          |                    |                    |          |                    |                    |          | Omicron BA.5       |                    |          |                    |                    |          |                    |                    |          |
| Cage                      |  | 7                                   |                    |          | 8                  |                    |          | 9                  |                    |          | 10                 |                    |          | 11                 |                    |          | 12                 |                    |          |
| gRNA copies per           |  | vaccinated contact                  | vaccinated contact | shedder  | vaccinated contact | vaccinated contact | shedder  | vaccinated contact | vaccinated contact | shedder  | vaccinated contact | vaccinated contact | shedder  | vaccinated contact | vaccinated contact | shedder  | vaccinated contact | vaccinated contact | shedder  |
| Oral swab 0 dpc           |  | 1.00E+00                            | 3.26E+01           | 9.37E+05 | 2.38E+01           | 1.00E+00           | 5.71E+04 | 1.00E+00           | 1.00E+00           | 9.32E+04 | 1.00E+00           | 1.00E+00           | 5.82E+04 | 1.00E+00           | 1.00E+00           | 6.42E+03 | 7.89E+00           | 1.00E+00           | 1.37E+04 |
| Oral swab 1 dpc           |  | 1.92E+03                            | 5.80E+02           | 4.81E+04 | 1.14E+03           | 2.00E+03           | 1.58E+05 | 1.66E+03           | 6.26E+02           | 1.18E+05 | 1.01E+03           | 3.73E+02           | 5.44E+05 | 1.71E+02           | 1.97E+02           | 1.12E+04 | 1.80E+02           | 6.04E+02           | 2.62E+04 |
| Oral swab 2 dpc           |  | 7.96E+04                            | 2.84E+04           | 2.48E+04 | 9.72E+03           | 2.25E+04           | 2.05E+04 | 5.05E+04           | 3.04E+04           | 5.85E+04 | 3.44E+03           | 2.03E+03           | 2.30E+04 | 1.46E+02           | 8.89E+02           | 9.68E+02 | 4.80E+01           | 2.02E+02           | 1.80E+03 |
| Oral swab 3 dpc           |  | 2.26E+04                            | 2.35E+03           | 8.29E+03 | 2.04E+04           | 2.98E+04           | 2.25E+04 | 3.08E+03           | 3.26E+04           | 5.32E+04 | 2.13E+04           | 6.88E+03           | 7.88E+03 | 1.06E+03           | 2.38E+03           | 6.51E+03 | 7.48E+02           | 3.85E+03           | 2.03E+02 |
| Oral swab 4 dpc           |  | 2.01E+04                            | 4.22E+02           | 8.02E+03 | 1.44E+04           | 1.76E+04           | 6.97E+03 | 9.31E+03           | 9.96E+03           | 2.19E+03 | 8.99E+03           | 7.46E+03           | 3.17E+02 | 1.58E+03           | 8.00E+03           | 1.30E+03 | 6.25E+03           | 1.97E+04           | 4.11E+03 |
| Oral swab 5 dpc           |  | 1.30E+04                            | 1.43E+03           | 1.74E+03 | 1.30E+04           | 1.18E+03           | 2.79E+03 | 1.28E+04           | 4.36E+02           | 1.02E+05 | 4.61E+03           | 1.15E+04           | 8.84E+01 | 1.30E+04           | 3.72E+03           | 1.11E+01 | 7.96E+03           | 2.18E+04           | 9.11E+03 |
| Oral swab 6 dpc           |  | 2.51E+03                            | 1.75E+02           | 6.02E+02 | 1.65E+04           | 3.26E+03           | 2.72E+03 | 2.54E+04           | 4.06E+03           | 4.10E+03 | 1.88E+03           | 1.24E+03           | 5.75E+02 | 5.48E+03           | 1.28E+02           | 1.74E+01 | 4.48E+02           | 4.12E+03           | 5.53E+03 |
| Oropharyngeal swab        |  | 2.30E+04                            | 9.98E+03           | 5.39E+04 | 3.83E+05           | 2.14E+03           | 1.75E+05 | 6.54E+04           | 3.45E+04           | 2.90E+04 | 2.73E+03           | 8.00E+04           | 4.53E+04 | 1.13E+05           | 7.70E+03           | 2.00E+03 | 4.58E+04           | 3.72E+04           | 6.79E+03 |
| 2.5mg lung tissue         |  | 7.34E+03                            | 1.83E+03           | 6.32E+04 | 5.17E+03           | 5.43E+01           | 5.51E+05 | 1.12E+03           | 1.76E+05           | 7.81E+02 | 1.43E+04           | 4.33E+02           | 1.01E+04 | 9.87E+00           | 3.69E+01           | 1.33E+04 | 1.01E+04           | 1.39E+04           | 1.50E+04 |
| FFU per 50 mg lung tissue |  | 1.00E+00                            | 1.00E+00           | 1.00E+00 | 1.00E+00           | 1.00E+00           | 1.00E+00 | 1.00E+00           | 1.00E+00           | 1.00E+00 | 1.00E+00           | 1.00E+02           | 1.00E+02 | 1.00E+00           | 1.00E+00           | 1.00E+00 | 1.00E+00           | 1.00E+00           | 1.00E+00 |
| SNT B.1                   |  | 1024                                | 2048               | 512      | 512                | 256                | 512      | 256                | 256                | 512      | 16                 | 8                  | 4        | 8                  | 256                | 4        | 16                 | 32                 | 8        |
| SNT Delta                 |  | 256                                 | 256                | 256      | 512                | 256                | 128      | 512                | 256                | 512      | 16                 | 16                 | 8        | 8                  | 128                | 32       | 16                 | 32                 | 64       |
| SNT BA.1                  |  | 4                                   | 4                  | 4        | 4                  | 64                 | 4        | 4                  | 32                 | 8        | 4                  | 4                  | 32       | 4                  | 8                  | 32       | 4                  | 4                  | 32       |
| SNT BA.5                  |  | 4                                   | 8                  | 4        | 4                  | 64                 | 4        | 4                  | 32                 | 16       | 128                | 64                 | 1024     | 4                  | 32                 | 1024     | 32                 | 16                 | 1024     |
| Vaccination (contacts)    |  | Mock                                |                    |          |                    |                    |          |                    |                    |          |                    |                    |          |                    |                    |          |                    |                    |          |
| Infection virus (shedder) |  | SARS-CoV-2 B.1                      |                    |          |                    |                    |          |                    |                    |          | Omicron BA.5       |                    |          |                    |                    |          |                    |                    |          |
| Cage                      |  | 13                                  |                    |          | 14                 |                    |          | 15                 |                    |          | 16                 |                    |          | 17                 |                    |          | 18                 |                    |          |
| gRNA copies per           |  | vaccinated contact                  | vaccinated contact | shedder  | vaccinated contact | vaccinated contact | shedder  | vaccinated contact | vaccinated contact | shedder  | vaccinated contact | vaccinated contact | shedder  | vaccinated contact | vaccinated contact | shedder  | vaccinated contact | vaccinated contact | shedder  |
| Oral swab 0 dpc           |  | 1.16E+01                            | 1.00E+00           | 5.50E+05 | 4.24E+00           | 4.61E+01           | 1.23E+05 | 4.72E+01           | 2.10E+00           | 3.77E+05 | 9.38E+00           | 1.21E+01           | 3.45E+04 | 2.69E+01           | 1.95E+01           | 4.04E+04 | 1.00E+00           | 9.20E+00           | 2.58E+04 |
| Oral swab 1 dpc           |  | 4.84E+03                            | 1.68E+03           | 1.63E+05 | 1.33E+03           | 3.17E+04           | 3.66E+04 | 2.28E+03           | 1.30E+03           | 3.79E+05 | 1.26E+01           | 4.30E+01           | 1.02E+05 | 3.09E+02           | 3.77E+01           | 8.45E+04 | 2.31E+01           | 4.22E+02           | 1.42E+05 |
| Oral swab 2 dpc           |  | 1.27E+06                            | 7.69E+04           | 1.36E+05 | 1.83E+05           | 1.95E+05           | 3.65E+04 | 1.83E+05           | 2.42E+05           | 3.42E+04 | 3.63E+03           | 4.53E+02           | 3.51E+04 | 5.62E+02           | 1.60E+02           | 2.41E+04 | 7.28E+02           | 6.21E+02           | 1.67E+04 |
| Oral swab 3 dpc           |  | 6.82E+04                            | 9.24E+04           | 7.95E+04 | 8.53E+04           | 9.84E+04           | 3.94E+03 | 1.92E+04           | 2.93E+04           | 4.48E+03 | 3.46E+04           | 3.17E+03           | 5.41E+03 | 6.86E+02           | 2.19E+04           | 2.70E+02 | 7.37E+02           | 2.99E+03           | 5.17E+02 |
| Oral swab 4 dpc           |  | 3.02E+04                            | 2.17E+05           | 2.24E+03 | 1.58E+04           | 2.19E+04           | 9.20E+03 | 6.99E+03           | 4.52E+04           | 3.99E+03 | 2.04E+04           | 1.17E+04           | 4.50E+03 | 4.98E+03           | 1.99E+04           | 8.75E+02 | 9.62E+03           | 2.02E+04           | 3.11E+02 |
| Oral swab 5 dpc           |  | 1.25E+05                            | 1.42E+04           | 4.88E+03 | 8.47E+04           | 1.94E+04           | 4.25E+03 | 3.59E+03           | 2.69E+04           | 4.13E+02 | 2.07E+03           | 7.04E+04           | 6.13E+02 | 2.01E+04           | 1.12E+04           | 4.52E+03 | 1.00E+00           | 1.68E+04           | 8.06E+02 |
| Oral swab 6 dpc           |  | 7.96E+03                            | 7.81E+02           | 2.28E+03 | 1.99E+04           | 3.47E+03           | 2.33E+04 | 1.37E+03           | 2.58E+05           | 1.84E+04 | 1.34E+04           | 1.12E+04           | 2.42E+02 | 5.84E+01           | 9.14E+02           | 2.11E+01 | 1.42E+04           | 3.21E+04           | 1.89E+02 |
| Oropharyngeal swab        |  | 1.80E+05                            | 4.15E+04           | 2.67E+03 | 3.39E+04           | 4.77E+05           | 8.96E+04 | 8.71E+04           | 2.19E+04           | 2.36E+05 | 2.09E+04           | 7.05E+04           | 3.86E+04 | 2.72E+03           | 2.35E+03           | 3.52E+01 | 1.29E+05           | 2.79E+05           | 1.88E+04 |
| 2.5mg lung tissue         |  | 1.30E+06                            | 8.27E+05           | 6.03E+04 | 1.10E+06           | 1.05E+06           | 3.04E+04 | 1.52E+06           | 3.10E+06           | 1.14E+05 | 3.63E+04           | 2.80E+05           | 2.58E+02 | 3.15E+03           | 2.48E+04           | 6.46E+03 | 1.46E+03           | 1.88E+02           | 1.03E+03 |
| FFU per 50 mg lung tissue |  | 2.00E+03                            | 6.00E+03           | 1.00E+02 | 4.00E+03           | 2.00E+03           | 1.00E+00 | 2.00E+04           | 1.00E+04           | 1.00E+00 | 1.00E+02           | 1.00E+00           | 1.00E+00 | 1.00E+00           | 4.00E+03           | 1.00E+00 | 5.00E+02           | 1.00E+00           | 1.00E+00 |
| SNT B.1                   |  | 512                                 | 512                | 512      | 256                | 256                | 512      | 256                | 256                | 512      | 4                  | 4                  | 4        | 4                  | 4                  | 4        | 4                  | 4                  | 4        |
| SNT Delta                 |  | 256                                 | 256                | 256      | 128                | 256                | 512      | 256                | 256                | 256      | 4                  | 32                 | 8        | 4                  | 4                  | 64       | 4                  | 4                  | 32       |
| SNT BA.1                  |  | 4                                   | 4                  | 4        | 4                  | 4                  | 4        | 4                  | 8                  | 4        | 4                  | 4                  | 4        | 4                  | 8                  | 4        | 4                  | 4                  | 16       |
| SNT BA.5                  |  | 4                                   | 4                  | 4        | 4                  | 4                  | 4        | 4                  | 8                  | 4        | 128                | 256                | 1024     | 256                | 256                | 1024     | 128                | 4                  | 512      |

**Supplementary Table 1. Virological and serological outcomes in vaccinated contacts and their respective shedder hamsters, presented per group and cage.** The table displays gRNA copy numbers detected in oral and oropharyngeal swabs, as well as in 2.5 mg of lung tissue. Oral swabs were collected daily from day 0 to day 6 post contact (dpc). Focus forming units (FFU) show the number of infectious virus particles present in 50 mg lung tissue. Negative results obtained in qPCR and plaque assays were set to 1.00E+00. The neutralizing capacity against B.1, Delta, BA.1 and BA.5 was quantified in hamster sera collected 6 dpc. Negative results obtained in serum virus neutralization assays were set to 4.

| Transmission to vaccinated contacts |  |  |  |  |  |  |  |  |  |  |  |  |  |  |  |  |  |
|-------------------------------------|--|--|--|--|--|--|--|--|--|--|--|--|--|--|--|--|--|
| qPCR9 AFCS                          |  |  |  |  |  |  |  |  |  |  |  |  |  |  |  |  |  |
| SARS-CoV-2 B.1                      |  |  |  |  |  |  |  |  |  |  |  |  |  |  |  |  |  |
| Omicron BA.5                        |  |  |  |  |  |  |  |  |  |  |  |  |  |  |  |  |  |
| mRNA                                |  |  |  |  |  |  |  |  |  |  |  |  |  |  |  |  |  |
| Mock                                |  |  |  |  |  |  |  |  |  |  |  |  |  |  |  |  |  |
| Vaccination (contacts)              |  |  |  |  |  |  |  |  |  |  |  |  |  |  |  |  |  |
| Infection virus (shedder)           |  |  |  |  |  |  |  |  |  |  |  |  |  |  |  |  |  |
| Cage                                |  |  |  |  |  |  |  |  |  |  |  |  |  |  |  |  |  |
| sgRNA copies per                    |  |  |  |  |  |  |  |  |  |  |  |  |  |  |  |  |  |
| Oral swab 0 dpc                     |  |  |  |  |  |  |  |  |  |  |  |  |  |  |  |  |  |
| Oral swab 1 dpc                     |  |  |  |  |  |  |  |  |  |  |  |  |  |  |  |  |  |
| Oral swab 2 dpc                     |  |  |  |  |  |  |  |  |  |  |  |  |  |  |  |  |  |
| Oral swab 3 dpc                     |  |  |  |  |  |  |  |  |  |  |  |  |  |  |  |  |  |
| Oral swab 4 dpc                     |  |  |  |  |  |  |  |  |  |  |  |  |  |  |  |  |  |
| Oral swab 5 dpc                     |  |  |  |  |  |  |  |  |  |  |  |  |  |  |  |  |  |
| Oral swab 6 dpc                     |  |  |  |  |  |  |  |  |  |  |  |  |  |  |  |  |  |
| Mucosal anti-B.1 spike IgA (OD)     |  |  |  |  |  |  |  |  |  |  |  |  |  |  |  |  |  |
| Mucosal anti-BA.5 spike IgA (OD)    |  |  |  |  |  |  |  |  |  |  |  |  |  |  |  |  |  |
| Vaccination (contacts)              |  |  |  |  |  |  |  |  |  |  |  |  |  |  |  |  |  |
| Infection virus (shedder)           |  |  |  |  |  |  |  |  |  |  |  |  |  |  |  |  |  |
| Cage                                |  |  |  |  |  |  |  |  |  |  |  |  |  |  |  |  |  |
| sgRNA copies per                    |  |  |  |  |  |  |  |  |  |  |  |  |  |  |  |  |  |
| Oral swab 0 dpc                     |  |  |  |  |  |  |  |  |  |  |  |  |  |  |  |  |  |
| Oral swab 1 dpc                     |  |  |  |  |  |  |  |  |  |  |  |  |  |  |  |  |  |
| Oral swab 2 dpc                     |  |  |  |  |  |  |  |  |  |  |  |  |  |  |  |  |  |
| Oral swab 3 dpc                     |  |  |  |  |  |  |  |  |  |  |  |  |  |  |  |  |  |
| Oral swab 4 dpc                     |  |  |  |  |  |  |  |  |  |  |  |  |  |  |  |  |  |
| Oral swab 5 dpc                     |  |  |  |  |  |  |  |  |  |  |  |  |  |  |  |  |  |
| Oral swab 6 dpc                     |  |  |  |  |  |  |  |  |  |  |  |  |  |  |  |  |  |
| Mucosal anti-B.1 spike IgA (OD)     |  |  |  |  |  |  |  |  |  |  |  |  |  |  |  |  |  |
| Mucosal anti-BA.5 spike IgA (OD)    |  |  |  |  |  |  |  |  |  |  |  |  |  |  |  |  |  |
| Vaccination (contacts)              |  |  |  |  |  |  |  |  |  |  |  |  |  |  |  |  |  |
| Infection virus (shedder)           |  |  |  |  |  |  |  |  |  |  |  |  |  |  |  |  |  |
| Cage                                |  |  |  |  |  |  |  |  |  |  |  |  |  |  |  |  |  |
| sgRNA copies per                    |  |  |  |  |  |  |  |  |  |  |  |  |  |  |  |  |  |
| Oral swab 0 dpc                     |  |  |  |  |  |  |  |  |  |  |  |  |  |  |  |  |  |
| Oral swab 1 dpc                     |  |  |  |  |  |  |  |  |  |  |  |  |  |  |  |  |  |
| Oral swab 2 dpc                     |  |  |  |  |  |  |  |  |  |  |  |  |  |  |  |  |  |
| Oral swab 3 dpc                     |  |  |  |  |  |  |  |  |  |  |  |  |  |  |  |  |  |
| Oral swab 4 dpc                     |  |  |  |  |  |  |  |  |  |  |  |  |  |  |  |  |  |
| Oral swab 5 dpc                     |  |  |  |  |  |  |  |  |  |  |  |  |  |  |  |  |  |
| Oral swab 6 dpc                     |  |  |  |  |  |  |  |  |  |  |  |  |  |  |  |  |  |
| Mucosal anti-B.1 spike IgA (OD)     |  |  |  |  |  |  |  |  |  |  |  |  |  |  |  |  |  |
| Mucosal anti-BA.5 spike IgA (OD)    |  |  |  |  |  |  |  |  |  |  |  |  |  |  |  |  |  |

**Supplementary Table 2. Virological results and mucosal immunity of vaccinated contacts and infected shedders displayed per group and cage.** The table shows sgRNA copies detected in oral swabs and SARS-specific IgA levels against B.1 and BA.5 spike protein in nasal washes obtained at 6 days post contact (dpc), measured as optical density (OD) at 450 nm. Negative results obtained in qPCR assays were set to 1.00E+00.

|                           |  | Transmission to naïve contacts |               |                       |               |               |                       |               |               |                       |               |               |                       |               |               |                       |               |               |                       |
|---------------------------|--|--------------------------------|---------------|-----------------------|---------------|---------------|-----------------------|---------------|---------------|-----------------------|---------------|---------------|-----------------------|---------------|---------------|-----------------------|---------------|---------------|-----------------------|
| Vaccination (shedder)     |  | sCPD9 AFCS                     |               |                       |               |               |                       |               |               |                       |               |               |                       |               |               |                       |               |               |                       |
| Infection virus (shedder) |  | SARS-CoV-2 B.1                 |               |                       |               |               |                       |               |               |                       | Omicron BA.5  |               |                       |               |               |                       |               |               |                       |
| Cage                      |  | 1                              |               |                       | 2             |               |                       | 3             |               |                       | 4             |               |                       | 5             |               |                       | 6             |               |                       |
| gRNA copies per           |  | naive contact                  | naive contact | vaccinated + infected | naive contact | naive contact | vaccinated + infected | naive contact | naive contact | vaccinated + infected | naive contact | naive contact | vaccinated + infected | naive contact | naive contact | vaccinated + infected | naive contact | naive contact | vaccinated + infected |
| Oral swab 0 dpc           |  | 1.00E+00                       | 1.00E+00      | 1.93E+02              | 3.67E+00      | 5.78E+00      | 7.29E+01              | 1.47E+00      | 1.00E+00      | 1.64E+02              | 2.78E+00      | 4.28E+00      | 4.03E+04              | 1.77E+00      | 2.45E+00      | 2.82E+04              | 1.86E+00      | 4.33E+00      | 1.89E+04              |
| Oral swab 1 dpc           |  | 1.00E+00                       | 2.71E+00      | 1.99E+00              | 1.00E+00      | 1.00E+00      | 1.14E+01              | 1.39E+00      | 1.00E+00      | 1.00E+00              | 1.00E+00      | 1.00E+00      | 2.27E+01              | 1.00E+00      | 1.00E+00      | 6.59E+00              | 3.45E+00      | 2.36E+00      | 5.36E+02              |
| Oral swab 2 dpc           |  | 4.32E+00                       | 7.68E+00      | 9.22E+00              | 1.82E+00      | 1.00E+00      | 5.02E+00              | 1.00E+00      | 1.00E+00      | 1.00E+00              | 3.86E+01      | 6.14E+01      | 4.90E+00              | 1.00E+00      | 1.00E+00      | 1.01E+00              | 1.00E+00      | 3.42E+03      | 7.33E+01              |
| Oral swab 3 dpc           |  | 1.06E+01                       | 4.36E+01      | 6.42E+00              | 1.18E+01      | 7.64E+00      | 1.26E+01              | 5.22E+01      | 3.28E+01      | 1.03E+01              | 4.42E+00      | 4.39E+00      | 1.73E+01              | 7.92E+01      | 3.73E+01      | 1.03E+02              | 2.84E+01      | 3.18E+03      | 1.71E+01              |
| Oral swab 4 dpc           |  | 9.11E+00                       | 7.43E+00      | 5.63E+00              | 6.93E+00      | 4.97E+00      | 3.11E+00              | 1.00E+00      | 7.19E+00      | 8.01E+00              | 1.61E+00      | 2.67E+01      | 3.02E+01              | 1.00E+00      | 1.67E+00      | 2.18E+01              | 2.65E+00      | 2.69E+03      | 7.57E+01              |
| Oral swab 5 dpc           |  | 2.04E+01                       | 5.64E+01      | 1.90E+02              | 4.11E+01      | 8.64E+00      | 5.05E+01              | 1.09E+01      | 6.63E+01      | 1.14E+02              | 2.15E+01      | 1.27E+01      | 2.93E+01              | 5.01E+00      | 1.24E+01      | 6.40E+00              | 8.34E+00      | 4.51E+04      | 2.07E+01              |
| Oral swab 6 dpc           |  | 6.24E+00                       | 3.61E+00      | 1.00E+00              | 1.00E+00      | 2.56E+00      | 1.29E+01              | 8.20E+00      | 2.80E+00      | 5.84E+00              | 3.22E+00      | 4.09E+00      | 4.90E+00              | 3.93E+00      | 3.90E+00      | 4.51E+00              | 2.68E+02      | 9.55E+04      | 1.36E+02              |
| Oropharyngeal swab        |  | 9.47E+00                       | 1.36E+00      | 3.02E+00              | 1.42E+00      | 3.09E+00      | 2.79E+00              | 4.73E+00      | 3.76E+00      | 7.27E+00              | 1.92E+00      | 5.98E+00      | 1.70E+01              | 4.94E+00      | 2.53E+00      | 6.86E+00              | 8.45E+04      | 3.75E+05      | 4.31E+01              |
| 2.5mg lung tissue         |  | 1.00E+00                       | 1.00E+00      | 3.40E+00              | 1.00E+00      | 1.00E+00      | 1.00E+00              | 1.00E+00      | 1.00E+00      | 1.00E+00              | 1.00E+00      | 1.00E+00      | 1.00E+00              | 1.00E+00      | 1.00E+00      | 6.26E+00              | 2.07E+02      | 8.03E+05      | 3.75E+00              |
| FFU per 50 mg lung tissue |  | 1.00E+00                       | 1.00E+00      | 1.00E+00              | 1.00E+00      | 1.00E+00      | 1.00E+00              | 1.00E+00      | 1.00E+00      | 1.00E+00              | 1.00E+00      | 1.00E+00      | 1.00E+00              | 1.00E+00      | 1.00E+00      | 1.00E+00              | 1.00E+00      | 8.00E+04      | 1.00E+00              |
| SNT B.1 6 dpc             |  | 4                              | 4             | 256                   | 4             | 4             | 512                   | 4             | 4             | 2048                  | 4             | 4             | 2048                  | 4             | 4             | 2048                  | 4             | 4             | 2048                  |
| SNT B.1 0 dpc             |  |                                |               | 512                   |               |               | 512                   |               |               | 1024                  |               |               | 512                   |               |               | 1024                  |               |               | 512                   |
| SNT Delta                 |  | 4                              | 4             | 256                   | 4             | 4             | 256                   | 4             | 4             | 512                   | 4             | 4             | 2048                  | 4             | 4             | 2048                  | 4             | 4             | 2048                  |
| SNT BA.1                  |  | 4                              | 4             | 64                    | 4             | 4             | 128                   | 4             | 4             | 64                    | 4             | 4             | 128                   | 4             | 4             | 512                   | 4             | 4             | 256                   |
| SNT BA.5 6 dpc            |  | 4                              | 4             | 16                    | 4             | 4             | 64                    | 4             | 4             | 128                   | 4             | 4             | 512                   | 4             | 4             | 2048                  | 4             | 16            | 256                   |
| SNT BA.5 0 dpc            |  |                                |               | 32                    |               |               | 64                    |               |               | n.t.                  |               |               | 128                   |               |               | n.t.                  |               |               | 4                     |
| Vaccination (shedder)     |  | mRNA                           |               |                       |               |               |                       |               |               |                       |               |               |                       |               |               |                       |               |               |                       |
| Infection virus (shedder) |  | SARS-CoV-2 B.1                 |               |                       |               |               |                       |               |               |                       | Omicron BA.5  |               |                       |               |               |                       |               |               |                       |
| Cage                      |  | 7                              |               |                       | 8             |               |                       | 9             |               |                       | 10            |               |                       | 11            |               |                       | 12            |               |                       |
| gRNA copies per           |  | naive contact                  | naive contact | vaccinated + infected | naive contact | naive contact | vaccinated + infected | naive contact | naive contact | vaccinated + infected | naive contact | naive contact | vaccinated + infected | naive contact | naive contact | vaccinated + infected | naive contact | naive contact | vaccinated + infected |
| Oral swab 0 dpc           |  | 1.00E+00                       | 1.00E+00      | 9.94E+04              | 4.13E+00      | 4.75E+00      | 8.85E+05              | 1.00E+00      | 1.00E+00      | 9.13E+04              | 1.00E+00      | 1.00E+00      | 4.04E+04              | 1.00E+00      | 1.00E+00      | 7.16E+03              | 1.13E+00      | 2.75E+00      | 3.72E+04              |
| Oral swab 1 dpc           |  | 2.76E+01                       | 8.12E+01      | 2.55E+04              | 6.35E+03      | 1.02E+02      | 8.13E+03              | 1.92E+02      | 1.52E+02      | 3.21E+04              | 7.85E+01      | 1.15E+01      | 2.67E+04              | 5.55E+00      | 1.18E+01      | 1.29E+06              | 6.69E+01      | 6.44E+02      | 2.22E+04              |
| Oral swab 2 dpc           |  | 5.50E+01                       | 2.51E+02      | 5.45E+04              | 1.04E+05      | 3.87E+05      | 7.11E+03              | 3.09E+02      | 9.74E+04      | 2.37E+03              | 1.79E+03      | 2.54E+02      | 6.13E+02              | 4.21E+02      | 2.09E+01      | 6.80E+04              | 1.20E+04      | 4.30E+00      | 2.95E+03              |
| Oral swab 3 dpc           |  | 1.94E+02                       | 9.17E+04      | 2.39E+03              | 6.86E+04      | 1.00E+05      | 7.12E+02              | 1.29E+02      | 2.38E+05      | 3.94E+02              | 2.07E+04      | 3.01E+03      | 1.28E+02              | 1.94E+04      | 8.43E+02      | 1.94E+02              | 1.23E+04      | 1.21E+04      | 2.66E+02              |
| Oral swab 4 dpc           |  | 2.77E+05                       | 1.79E+05      | 3.54E+03              | 1.11E+04      | 9.68E+03      | 3.00E+03              | 3.51E+05      | 4.01E+04      | 1.01E+03              | 1.31E+04      | 1.30E+04      | 1.39E+02              | 2.62E+04      | 8.07E+02      | 2.64E+02              | 2.27E+03      | 8.03E+04      | 1.58E+02              |
| Oral swab 5 dpc           |  | 2.97E+04                       | 1.84E+04      | 1.09E+02              | 2.13E+04      | 1.26E+03      | 1.55E+02              | 2.88E+04      | 2.09E+04      | 4.04E+02              | 9.02E+03      | 1.43E+04      | 2.63E+01              | 5.60E+03      | 2.55E+03      | 1.28E+02              | 3.01E+03      | 1.70E+04      | 1.04E+02              |
| Oral swab 6 dpc           |  | 7.80E+03                       | 2.50E+04      | 3.41E+02              | 6.60E+02      | 9.58E+03      | 7.67E+01              | 3.69E+04      | 1.41E+04      | 4.16E+01              | 1.16E+03      | 1.46E+04      | 1.75E+01              | 3.76E+01      | 8.98E+03      | 1.26E+01              | 4.93E+01      | 2.28E+03      | 2.86E+01              |
| Oropharyngeal swab        |  | 4.98E+05                       | 8.07E+05      | 5.66E+01              | 4.64E+04      | 1.48E+05      | 1.97E+02              | 3.00E+05      | 6.76E+05      | 2.89E+02              | 6.29E+04      | 2.36E+05      | 9.12E+03              | 4.00E+04      | 7.72E+03      | 9.40E+01              | 5.40E+04      | 8.88E+04      | 9.26E+01              |
| 2.5mg lung tissue         |  | 1.18E+06                       | 1.03E+07      | 7.24E+01              | 6.87E+05      | 8.60E+05      | 6.43E+02              | 5.08E+06      | 2.24E+07      | 6.57E+02              | 4.02E+03      | 5.74E+02      | 1.10E+02              | 2.69E+04      | 3.07E+02      | 3.06E+03              | 2.00E+04      | 3.69E+04      | 2.70E+01              |
| FFU per 50 mg lung tissue |  | 3.00E+03                       | 6.00E+04      | 1.00E+00              | 1.00E+03      | 5.00E+02      | 1.00E+00              | 2.00E+05      | 1.00E+05      | 1.00E+00              | 1.00E+00      | 1.00E+00      | 1.00E+00              | 1.00E+02      | 2.50E+02      | 1.00E+00              | 1.00E+02      | 1.30E+03      | 1.00E+00              |
| SNT B.1 6 dpc             |  | 32                             | 16            | 512                   | 512           | 256           | 128                   | 4             | 64            | 512                   | 4             | 4             | 256                   | 4             | 4             | 128                   | 4             | 4             | 128                   |
| SNT B.1 0 dpc             |  |                                |               | 128                   |               |               | 4                     |               |               | 128                   |               |               | 128                   |               |               | 32                    |               |               | 4                     |
| SNT Delta                 |  | 64                             | 8             | 512                   | 512           | 256           | 64                    | 4             | 128           | 512                   | 4             | 4             | 256                   | 4             | 4             | 128                   | 4             | 4             | 32                    |
| SNT BA.1                  |  | 4                              | 4             | 32                    | 32            | 4             | 4                     | 4             | 4             | 4                     | 4             | 4             | 4                     | 4             | 4             | 4                     | 4             | 4             | 4                     |
| SNT BA.5 6 dpc            |  | 4                              | 4             | 64                    | 4             | 4             | 4                     | 4             | 4             | 16                    | 256           | 128           | 256                   | 64            | 4             | 512                   | 256           | 4             | 256                   |
| SNT BA.5 0 dpc            |  |                                |               | n.t.                  |               |               | 4                     |               |               | 4                     |               |               | 4                     |               | 4             |                       |               |               | 4                     |
| Vaccination (shedder)     |  | Mock                           |               |                       |               |               |                       |               |               |                       |               |               |                       |               |               |                       |               |               |                       |
| Infection virus (shedder) |  | SARS-CoV-2 B.1                 |               |                       |               |               |                       |               |               |                       | Omicron BA.5  |               |                       |               |               |                       |               |               |                       |
| Cage                      |  | 13                             |               |                       | 14            |               |                       | 15            |               |                       | 16            |               |                       | 17            |               |                       | 18            |               |                       |
| gRNA copies per           |  | naive contact                  | naive contact | vaccinated + infected | naive contact | naive contact | vaccinated + infected | naive contact | naive contact | vaccinated + infected | naive contact | naive contact | vaccinated + infected | naive contact | naive contact | vaccinated + infected | naive contact | naive contact | vaccinated + infected |
| Oral swab 0 dpc           |  | 1.00E+00                       | 1.00E+00      | 9.72E+04              | 1.09E+00      | 3.70E+01      | 2.29E+05              | 1.00E+00      | 1.00E+00      | 1.18E+05              | 1.71E+00      | 1.00E+00      | 2.58E+04              | 1.00E+00      | 1.00E+00      | 5.65E+03              | 1.00E+00      | 2.86E+00      | 1.72E+05              |
| Oral swab 1 dpc           |  | 1.49E+04                       | 4.40E+03      | 8.48E+05              | 7.09E+03      | 1.77E+04      | 2.38E+05              | 3.88E+03      | 9.64E+03      | 8.78E+04              | 1.11E+02      | 3.87E+01      | 6.65E+04              | 9.67E+01      | 4.21E+01      | 6.31E+04              | 1.27E+02      | 2.15E+01      | 1.57E+05              |
| Oral swab 2 dpc           |  | 2.37E+05                       | 3.12E+05      | 7.21E+04              | 1.15E+05      | 1.82E+05      | 6.64E+03              | 1.97E+05      | 4.59E+05      | 5.50E+04              | 5.44E+04      | 3.27E+02      | 1.08E+03              | 4.24E+04      | 2.27E+03      | 3.72E+03              | 3.68E+04      | 3.16E+04      | 2.28E+03              |
| Oral swab 3 dpc           |  | 6.91E+04                       | 5.04E+05      | 5.93E+03              | 7.03E+04      | 1.91E+05      | 5.29E+04              | 1.41E+05      | 2.76E+05      | 3.68E+04              | 8.28E+04      | 2.71E+03      | 1.96E+03              | 2.31E+04      | 1.66E+04      | 1.19E+03              | 5.69E+03      | 2.32E+04      | 2.88E+02              |
| Oral swab 4 dpc           |  | 7.76E+03                       | 2.16E+04      | 5.20E+03              | 1.16E+04      | 2.60E+04      | 5.34E+03              | 2.64E+03      | 7.90E+04      | 3.95E+03              | 3.75E+04      | 2.05E+03      | 2.15E+01              | 1.94E+04      | 1.07E+05      | 1.46E+02              | 2.39E+04      | 1.50E+04      | 4.97E+03              |
| Oral swab 5 dpc           |  | 3.79E+04                       | 8.70E+03      | 1.23E+03              | 2.71E+04      | 2.03E+04      | 1.75E+03              | 5.84E+03      | 1.29E+04      | 3.00E+03              | 2.62E+04      | 3.08E+03      | 2.85E+03              | 5.73E+04      | 1.04E+04      | 2.22E+02              | 8.41E+03      | 6.25E+03      | 1.32E+02              |
| Oral swab 6 dpc           |  | 5.73E+03                       | 9.33E+03      | 8.34E+02              | 1.47E+04      | 5.60E+02      | 1.21E+03              | 1.83E+03      | 1.68E+03      | 7.54E+02              | 1.74E+03      | 3.34E+03      | 3.82E+01              | 6.21E+02      | 1.43E+03      | 9.86E+00              | 1.69E+03      | 3.56E+02      | 5.17E+01              |
| Oropharyngeal swab        |  | 3.52E+04                       | 2.29E+05      | 3.13E+03              | 3.59E+05      | 1.81E+05      | 7.84E+04              | 5.99E+04      | 8.78E+05      | 8.35E+04              | 2.65E+04      | 1.15E+05      | 2.32E+03              | 2.42E+04      | 3.81E+04      | 3.33E+02              | 3.48E+04      | 1.39E+04      | 3.27E+02              |
| 2.5mg lung tissue         |  | 4.57E+04                       | 2.34E+05      | 1.17E+04              | 1.80E+05      | 9.30E+05      | 2.95E+04              | 3.74E+05      | 1.25E+06      | 5.48E+03              | 9.62E+04      | 1.35E+03      | 8.57E+02              | 2.24E+04      | 5.32E+03      | 6.22E+02              | 1.55E+05      | 2.49E+02      | 9.07E+01              |
| FFU per 50 mg lung tissue |  | 1.00E+02                       | 6.00E+02      | 1.00E+00              | 1.00E+02      | 1.00E+03      | 1.00E+00              | 2.00E+02      | 5.00E+02      | 1.00E+00              | 4.00E+02      | 1.00E+00      | 1.00E+00              | 1.00E+00      | 1.00E+03      | 1.00E+00              | 2.00E+03      | 1.00E+00      | 1.00E+00              |
| SNT B.1 6 dpc             |  | 256                            | 256           | 256                   | 256           | 256           | 128                   | 256           | 256           | 256                   | 4             | 4             | 4                     | 4             | 4             | 4                     | 4             | 4             | 8                     |
| SNT B.1 0 dpc             |  |                                |               | 4                     |               |               | 4                     |               |               | 4                     |               |               | 4                     |               |               | 4                     |               |               | 4                     |
| SNT Delta                 |  | 256                            | 256           | 256                   | 512           | 256           | 256                   | 256           | 512           | 128                   | 4             | 4             | 4                     | 4             | 4             | 16                    | 4             | 4             | 32                    |
| SNT BA.1                  |  | 4                              | 4             | 8                     | 4             | 16            | 4                     | 4             | 32            | 8                     | 4             | 4             | 4                     | 4             | 4             | 4                     | 4             | 4             | 4                     |
| SNT BA.5 6 dpc            |  | 4                              | 4             | 4                     | 4             | 4             | 4                     | 4             | 8             | 8                     | 512           | 4             | 512                   | 512           | 256           | 256                   | 256           | 256           | 512                   |
| SNT BA.5 0 dpc            |  |                                |               | n.t.                  |               |               | 4                     |               |               | 4                     |               |               | 4                     |               | 4             |                       |               |               | 4                     |

**Supplementary Table 3. Virological and serological outcomes of naïve contacts and their respective vaccinated and infected shedder hamsters, shown per group and cage.** The table displays gRNA copy numbers detected in oral and oropharyngeal swabs, as well as in 2.5 mg lung tissue. Oral swabs were collected daily from day 0 to day 6 post contact (dpc). Focus forming units (FFU) show the number of infectious virus particles present in 50 mg of lung tissue, determined by plaque assay. Negative results obtained in qPCR and plaque assays were set to 1.00E+00. The neutralizing capacity against B.1, Delta, BA.1 and BA.5 was quantified in hamster sera collected 0 and 6 dpc. Negative results obtained in serum virus neutralization assays were set to

| Transmission to naïve contacts   |                |               |                       |               |               |                       |               |               |                       |               |               |                       |               |               |                       |               |               |                       |
|----------------------------------|----------------|---------------|-----------------------|---------------|---------------|-----------------------|---------------|---------------|-----------------------|---------------|---------------|-----------------------|---------------|---------------|-----------------------|---------------|---------------|-----------------------|
| sCPD9 AFCS                       |                |               |                       |               |               |                       |               |               |                       |               |               |                       |               |               |                       |               |               |                       |
| Vaccination (shedder)            |                |               |                       |               |               |                       |               |               |                       |               |               |                       |               |               |                       |               |               |                       |
| Infection virus (shedder)        | SARS-CoV-2 B.1 |               |                       |               |               |                       |               |               |                       | Omicron BA.5  |               |                       |               |               |                       |               |               |                       |
| Cage                             | 1              |               |                       | 2             |               |                       | 3             |               |                       | 4             |               |                       | 5             |               |                       | 6             |               |                       |
| sgRNA copies per                 | naive contact  | naive contact | vaccinated + infected | naive contact | naive contact | vaccinated + infected | naive contact | naive contact | vaccinated + infected | naive contact | naive contact | vaccinated + infected | naive contact | naive contact | vaccinated + infected | naive contact | naive contact | vaccinated + infected |
| Oral swab 0 dpc                  | 1.00E+00       | 1.00E+00      | 6.87E+00              | 1.00E+00      | 1.00E+00      | 2.56E+00              | 1.00E+00      | 1.00E+00      | 3.88E+00              | 1.00E+00      | 1.00E+00      | 6.69E+02              | 1.00E+00      | 1.00E+00      | 3.51E+02              | 1.00E+00      | 1.00E+00      | 2.40E+02              |
| Oral swab 1 dpc                  | 1.00E+00       | 1.00E+00      | 1.00E+00              | 1.00E+00      | 1.00E+00      | 2.87E+00              | 1.00E+00      | 1.00E+00      | 1.00E+00              | 1.00E+00      | 1.00E+00      | 1.00E+00              | 1.00E+00      | 1.00E+00      | 1.00E+00              | 1.00E+00      | 1.00E+00      | 1.01E+01              |
| Oral swab 2 dpc                  | 1.00E+00       | 1.00E+00      | 1.00E+00              | 1.00E+00      | 1.00E+00      | 1.00E+00              | 1.00E+00      | 1.00E+00      | 1.00E+00              | 1.00E+00      | 1.00E+00      | 1.00E+00              | 1.00E+00      | 1.00E+00      | 1.00E+00              | 1.00E+00      | 1.00E+00      | 3.27E+00              |
| Oral swab 3 dpc                  | 1.00E+00       | 1.00E+00      | 1.00E+00              | 1.00E+00      | 1.00E+00      | 1.00E+00              | 1.00E+00      | 1.00E+00      | 1.00E+00              | 1.00E+00      | 1.00E+00      | 2.57E+00              | 1.00E+00      | 1.00E+00      | 1.00E+00              | 1.00E+00      | 1.00E+00      | 5.55E+01              |
| Oral swab 4 dpc                  | 1.00E+00       | 1.00E+00      | 1.00E+00              | 1.00E+00      | 1.00E+00      | 1.00E+00              | 1.00E+00      | 1.00E+00      | 1.00E+00              | 1.00E+00      | 1.00E+00      | 1.00E+00              | 1.00E+00      | 1.00E+00      | 1.00E+00              | 1.00E+00      | 1.00E+00      | 2.82E+01              |
| Oral swab 5 dpc                  | 1.00E+00       | 1.00E+00      | 8.13E+00              | 1.00E+00      | 1.00E+00      | 1.00E+00              | 1.00E+00      | 1.00E+00      | 3.20E+00              | 3.45E+00      | 1.00E+00      | 1.00E+00              | 1.00E+00      | 1.00E+00      | 1.00E+00              | 1.00E+00      | 1.00E+00      | 1.03E+03              |
| Oral swab 6 dpc                  | 1.00E+00       | 1.00E+00      | 1.00E+00              | 1.00E+00      | 1.00E+00      | 1.00E+00              | 1.00E+00      | 1.00E+00      | 1.00E+00              | 1.00E+00      | 1.00E+00      | 1.00E+00              | 1.00E+00      | 1.00E+00      | 1.00E+00              | 1.00E+00      | 1.00E+00      | 3.40E+00              |
| Mucosal anti-B.1 spike IgA (OD)  | -0.0313        | -0.0306       | 2.5460                | -0.0292       | -0.0294       | 2.0666                | -0.0107       | -0.0285       | 0.7557                | -0.0301       | -0.0151       | 0.7846                | -0.0306       | -0.0278       | 2.1817                | -0.0296       | -0.0304       | 1.7255                |
| Mucosal anti-BA.5 spike IgA (OD) | -0.0296        | -0.0272       | 2.0410                | -0.0267       | -0.0282       | 1.3512                | -0.0090       | -0.0273       | 0.4651                | -0.0298       | -0.0123       | 0.8246                | -0.0272       | -0.0252       | 1.5550                | -0.0288       | -0.0266       | 1.3133                |
| Vaccination (shedder)            | mRNA           |               |                       |               |               |                       |               |               |                       |               |               |                       |               |               |                       |               |               |                       |
| Infection virus (shedder)        | SARS-CoV-2 B.1 |               |                       |               |               |                       |               |               |                       | Omicron BA.5  |               |                       |               |               |                       |               |               |                       |
| Cage                             | 7              |               |                       | 8             |               |                       | 9             |               |                       | 10            |               |                       | 11            |               |                       | 12            |               |                       |
| sgRNA copies per                 | naive contact  | naive contact | vaccinated + infected | naive contact | naive contact | vaccinated + infected | naive contact | naive contact | vaccinated + infected | naive contact | naive contact | vaccinated + infected | naive contact | naive contact | vaccinated + infected | naive contact | naive contact | vaccinated + infected |
| Oral swab 0 dpc                  | 1.00E+00       | 1.00E+00      | 1.79E+03              | 1.00E+00      | 1.00E+00      | 1.97E+04              | 1.00E+00      | 1.00E+00      | 1.48E+03              | 1.00E+00      | 1.00E+00      | 4.00E+02              | 1.00E+00      | 1.00E+00      | 3.86E+01              | 1.00E+00      | 1.00E+00      | 4.35E+02              |
| Oral swab 1 dpc                  | 5.66E+00       | 1.00E+00      | 4.83E+02              | 5.08E+01      | 1.00E+00      | 1.36E+02              | 3.68E+00      | 5.48E+00      | 8.23E+02              | 2.31E+00      | 1.00E+00      | 6.61E+02              | 1.00E+00      | 1.00E+00      | 5.53E+04              | 1.00E+00      | 2.26E+01      | 3.87E+02              |
| Oral swab 2 dpc                  | 6.30E+01       | 6.80E+00      | 8.98E+02              | 2.12E+03      | 4.41E+03      | 1.50E+02              | 6.55E+00      | 1.29E+03      | 1.59E+02              | 4.79E+01      | 6.52E+00      | 3.83E+01              | 1.87E+01      | 7.78E+00      | 2.54E+03              | 1.83E+02      | 1.00E+00      | 6.29E+01              |
| Oral swab 3 dpc                  | 1.00E+00       | 1.30E+03      | 9.67E+01              | 9.95E+02      | 1.15E+03      | 9.04E+00              | 3.85E+00      | 3.57E+03      | 7.47E+00              | 5.33E+02      | 1.01E+02      | 4.99E+00              | 1.95E+02      | 4.08E+01      | 1.28E+01              | 3.19E+02      | 1.91E+02      | 1.01E+01              |
| Oral swab 4 dpc                  | 9.39E+03       | 4.55E+03      | 6.92E+01              | 2.17E+02      | 1.58E+02      | 4.15E+01              | 9.07E+03      | 1.28E+03      | 2.31E+01              | 7.93E+02      | 3.24E+02      | 4.43E+00              | 2.52E+03      | 3.63E+02      | 7.79E+00              | 1.31E+02      | 2.26E+03      | 6.10E+00              |
| Oral swab 5 dpc                  | 1.00E+03       | 2.01E+02      | 8.05E+00              | 4.94E+02      | 1.79E+01      | 3.53E+00              | 7.15E+02      | 5.46E+02      | 1.14E+01              | 2.75E+02      | 3.50E+02      | 1.00E+00              | 2.53E+02      | 7.12E+02      | 5.85E+00              | 1.55E+02      | 5.96E+02      | 1.00E+00              |
| Oral swab 6 dpc                  | 1.54E+02       | 3.90E+02      | 4.54E+00              | 1.01E+01      | 1.44E+02      | 1.00E+00              | 7.01E+02      | 2.55E+02      | 1.00E+00              | 3.26E+01      | 2.30E+02      | 1.00E+00              | 1.00E+00      | 2.59E+03      | 1.00E+00              | 1.00E+00      | 5.56E+01      | 1.00E+00              |
| Mucosal anti-B.1 spike IgA (OD)  | -0.0012        | 0.0067        | 0.1689                | 0.0213        | 0.0814        | 0.7770                | 0.0040        | 0.0463        | 0.3734                | 0.0104        | 0.0033        | 0.0761                | 0.0068        | 0.0188        | 0.1946                | 0.0108        | 0.0070        | 0.7082                |
| Mucosal anti-BA.5 spike IgA (OD) | -0.0192        | -0.0187       | 0.0941                | -0.0196       | -0.0173       | 0.6101                | -0.0174       | 0.0014        | 0.2125                | 0.2125        | 0.0511        | 0.1276                | 0.0165        | 0.0016        | 0.2810                | 0.0212        | -0.0106       | 0.7049                |
| Vaccination (shedder)            | Mock           |               |                       |               |               |                       |               |               |                       |               |               |                       |               |               |                       |               |               |                       |
| Infection virus (shedder)        | SARS-CoV-2 B.1 |               |                       |               |               |                       |               |               |                       | Omicron BA.5  |               |                       |               |               |                       |               |               |                       |
| Cage                             | 13             |               |                       | 14            |               |                       | 15            |               |                       | 16            |               |                       | 17            |               |                       | 18            |               |                       |
| sgRNA copies per                 | naive contact  | naive contact | vaccinated + infected | naive contact | naive contact | vaccinated + infected | naive contact | naive contact | vaccinated + infected | naive contact | naive contact | vaccinated + infected | naive contact | naive contact | vaccinated + infected | naive contact | naive contact | vaccinated + infected |
| Oral swab 0 dpc                  | 1.00E+00       | 1.00E+00      | 3.12E+03              | 1.00E+00      | 1.00E+00      | 3.89E+03              | 1.00E+00      | 1.00E+00      | 2.45E+03              | 1.00E+00      | 1.00E+00      | 5.72E+02              | 1.00E+00      | 1.00E+00      | 5.36E+01              | 1.00E+00      | 1.00E+00      | 2.09E+03              |
| Oral swab 1 dpc                  | 2.67E+02       | 8.73E+01      | 1.88E+04              | 5.49E+01      | 2.48E+02      | 5.63E+03              | 7.09E+01      | 1.77E+02      | 1.50E+03              | 3.90E+00      | 3.32E+00      | 2.36E+03              | 4.02E+00      | 1.00E+00      | 1.42E+03              | 2.62E+00      | 1.00E+00      | 3.79E+03              |
| Oral swab 2 dpc                  | 4.25E+03       | 6.24E+03      | 1.69E+03              | 1.60E+03      | 3.21E+03      | 9.32E+01              | 4.02E+03      | 8.97E+03      | 7.28E+02              | 6.91E+02      | 5.49E+00      | 4.07E+01              | 7.32E+02      | 3.33E+01      | 7.12E+01              | 3.27E+02      | 4.68E+02      | 5.86E+01              |
| Oral swab 3 dpc                  | 1.95E+03       | 1.43E+04      | 1.09E+02              | 1.98E+03      | 7.94E+03      | 2.18E+03              | 4.45E+03      | 8.56E+03      | 9.70E+02              | 4.39E+03      | 1.37E+02      | 5.20E+01              | 7.33E+02      | 6.58E+02      | 2.07E+01              | 1.27E+02      | 9.86E+02      | 9.09E+00              |
| Oral swab 4 dpc                  | 1.33E+02       | 8.24E+02      | 9.45E+01              | 3.89E+02      | 7.70E+02      | 1.35E+02              | 7.88E+01      | 1.46E+03      | 7.42E+01              | 1.14E+03      | 8.73E+01      | 4.48E+00              | 7.58E+02      | 3.26E+03      | 9.41E+00              | 8.45E+02      | 9.58E+02      | 9.64E+01              |
| Oral swab 5 dpc                  | 5.16E+02       | 1.84E+02      | 1.23E+01              | 3.36E+02      | 2.25E+02      | 2.53E+01              | 3.69E+01      | 1.01E+02      | 1.20E+02              | 5.10E+02      | 8.97E+01      | 4.51E+01              | 1.69E+03      | 2.01E+02      | 3.29E+00              | 1.22E+02      | 1.10E+02      | 1.00E+00              |
| Oral swab 6 dpc                  | 8.02E+01       | 1.61E+02      | 2.20E+01              | 2.63E+02      | 2.62E+01      | 2.91E+01              | 4.35E+01      | 7.98E+01      | 3.32E+01              | 3.36E+01      | 8.97E+01      | 1.00E+00              | 1.63E+01      | 3.24E+01      | 1.00E+00              | 7.83E+01      | 1.31E+01      | 1.00E+00              |
| Mucosal anti-B.1 spike IgA (OD)  | 0.0723         | 0.0235        | 0.7220                | 0.1600        | 0.0922        | 0.0938                | 0.0321        | 0.0308        | 0.0772                | -0.0022       | -0.0048       | 0.0062                | 0.0207        | 0.0226        | 0.0582                | 0.0471        | 0.0110        | 0.0016                |
| Mucosal anti-BA.5 spike IgA (OD) | 0.0198         | 0.0092        | 0.1550                | 0.0774        | 0.0461        | 0.0637                | 0.0418        | 0.0465        | 0.0417                | 0.0731        | 0.0451        | 0.1801                | 0.0518        | 0.0318        | 0.1280                | 0.0588        | 0.0114        | 0.0755                |

**Supplementary Table 4. Virological results and mucosal immunity of naïve contacts and their respective vaccinated and infected shedder animals, presented per group and cage.** The table shows sgRNA copies detected in oral swabs, and SARS-CoV-2-specific IgA levels against B.1 and BA.5 spike protein in nasal washes obtained at 6 days post contact (dpc), measured in optical density (OD) at 450 nm. Negative results obtained in qPCR assays were set to 1.00E+00.
